# Supplementary material
Source: Copernicus journal article supplement (doi:10.5194/egusphere-2026-3486)
Supplement: Supplementary file 1 [file egusphere-2026-3486-supplement.pdf]

Supplementary Information

For

**Temporal variability in offshore Fe fluxes in the Peruvian oxygen  
minimum zone across an El Niño termination**

Guanghai Chen<sup>1</sup>, Insa Rapp<sup>2</sup>, Matthias Sieber<sup>3,4</sup>, Eric P. Achterberg<sup>2</sup>, Tim M. Conway<sup>3</sup>, Martha Gledhill<sup>2</sup>, Mark J. Hopwood<sup>2,5</sup>, Ruifang C. Xie<sup>1,2,6</sup>

<sup>1</sup> State Key Laboratory of Submarine Geoscience and School of Oceanography, Shanghai Jiao Tong University, 1954 Huashan Road, Shanghai, 200030, China.

<sup>2</sup> GEOMAR Helmholtz Centre for Ocean Research, Kiel, 24148, Germany

<sup>3</sup> College of Marine Science, University of South Florida, USA

<sup>4</sup> Department of Earth and Planetary Sciences, ETH Zürich, Switzerland

<sup>5</sup> Department of Ocean Science and Engineering, Southern University of Science and Technology, Shenzhen, China

<sup>6</sup> Key Laboratory for Polar Science, Polar Research Institute of China, Ministry of Natural Resources, Shanghai, 200136, China

*Correspondence to:* Ruifang C. Xie (ruifang.xie@sjtu.edu.cn)

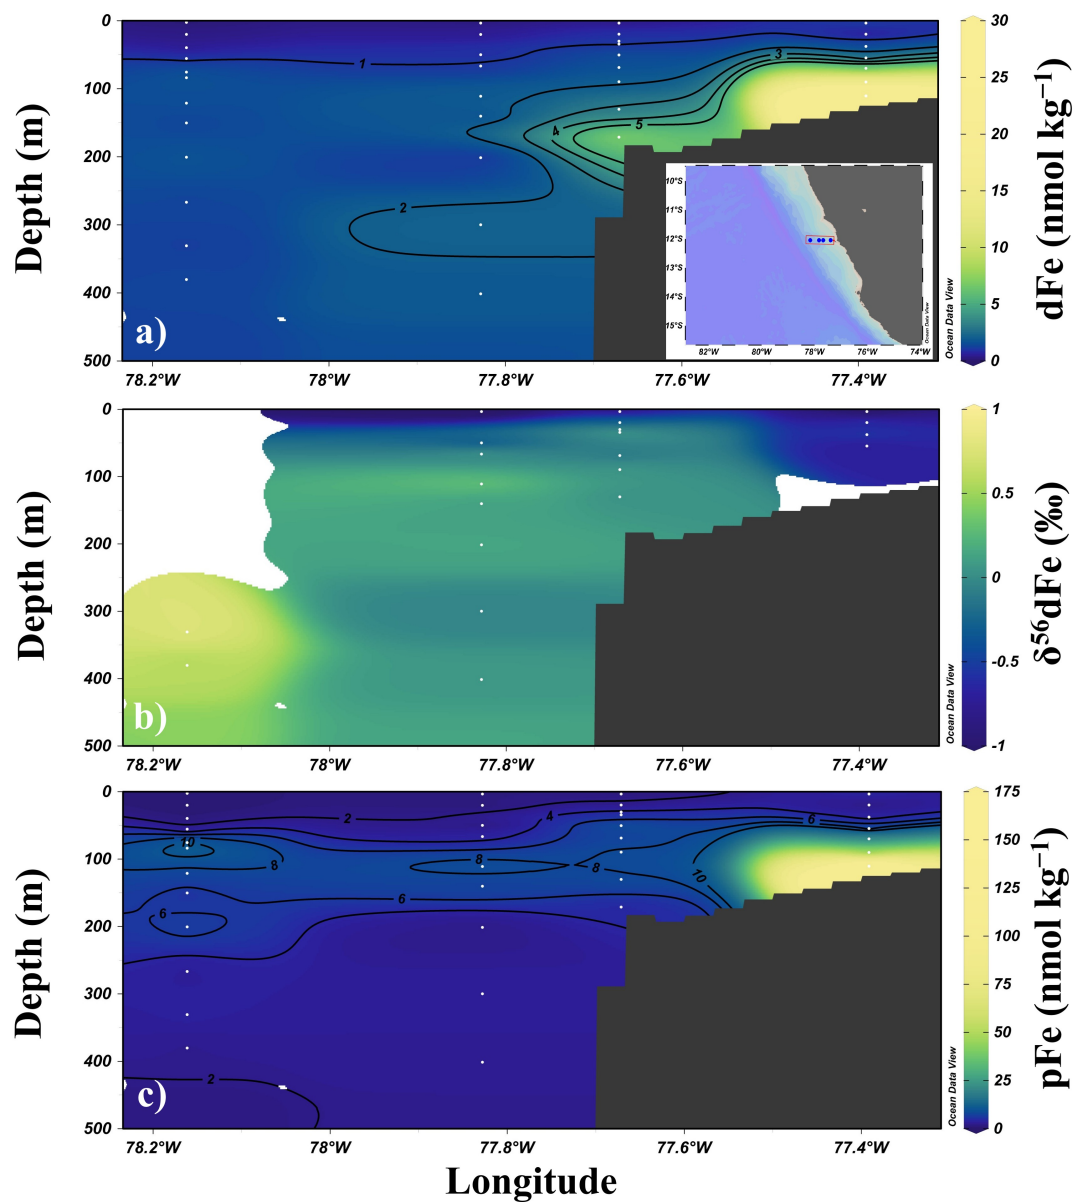

**Figure S1.** GEOTRACES P16 transects of **a)** dFe, **b)**  $\delta^{56}\text{dFe}$ , and **c)** pFe. Data are from GEOTRACES Intermediate Data Product 2025 (GEOTRACES IDP, 2025). The diagram was produced using Ocean Data View (Schlitzer, 2023).

## References

- GEOTRACES Intermediate Data Product Group.: The GEOTRACES Intermediate Data Product 2025 (IDP2025). NERC EDS British Oceanographic Data Centre NOC. [doi:10.5285/42c92148-8d03-8be6-e063-7086abc09f0c](https://doi.org/10.5285/42c92148-8d03-8be6-e063-7086abc09f0c), 2025.
- Schlitzer, R.: Ocean Data View, <https://odv.awi.de>, 2023.
